# Supplementary material
Source: PubMed Central journal article supplement (PMC6719556)
Supplement: NIHMS1037677-supplement-supplemental.pdf [file NIHMS1037677-supplement-supplemental.pdf]

In the format provided by the authors and unedited.

# T cell antigen discovery via trogocytosis

Guideng Li <sup>1,2,3,12\*</sup>, Michael T. Bethune<sup>1,12\*</sup>, Stephanie Wong<sup>1</sup>, Alok V. Joglekar <sup>1</sup>, Michael T. Leonard <sup>1</sup>, Jessica K. Wang <sup>1</sup>, Jocelyn T. Kim<sup>4</sup>, Donghui Cheng<sup>5</sup>, Songming Peng<sup>6</sup>, Jesse M. Zaretsky<sup>7</sup>, Yapeng Su<sup>1,6</sup>, Yicheng Luo<sup>1</sup>, James R. Heath<sup>6,7,8</sup>, Antoni Ribas<sup>7,9,10,11</sup>, Owen N. Witte<sup>5,7,11</sup> and David Baltimore <sup>1,8\*</sup>

<sup>1</sup>Division of Biology and Biological Engineering, California Institute of Technology, Pasadena, CA, USA. <sup>2</sup>Center of Systems Medicine, Institute of Basic Medical Sciences, Chinese Academy of Medical Sciences & Peking Union Medical College, Beijing, China. <sup>3</sup>Suzhou Institute of Systems Medicine, Suzhou, China. <sup>4</sup>Division of Infectious Diseases, Department of Medicine, University of California, Los Angeles, Los Angeles, CA, USA. <sup>5</sup>Department of Microbiology, Immunology, and Molecular Genetics, University of California, Los Angeles, Los Angeles, CA, USA. <sup>6</sup>Division of Chemistry and Chemical Engineering, California Institute of Technology, Pasadena, CA, USA. <sup>7</sup>Department of Molecular and Medical Pharmacology, David Geffen School of Medicine, University of California, Los Angeles, Los Angeles, CA, USA. <sup>8</sup>Parker Institute for Cancer Immunotherapy (PICI) Center, California Institute of Technology, Pasadena, CA, USA. <sup>9</sup>Division of Hematology & Oncology, Department of Medicine, and Division of Surgical Oncology, Department of Surgery, David Geffen School of Medicine, University of California, Los Angeles, Los Angeles, CA, USA. <sup>10</sup>Jonsson Comprehensive Cancer Center, University of California, Los Angeles, Los Angeles, CA, USA. <sup>11</sup>Parker Institute for Cancer Immunotherapy (PICI) Center, University of California, Los Angeles, Los Angeles, CA, USA. <sup>12</sup>These authors contributed equally: G. Li, M. T. Bethune. \*e-mail: [lgd@ism.cams.cn](mailto:lgd@ism.cams.cn); [mbethune@pactpharma.com](mailto:mbethune@pactpharma.com); [baltimo@caltech.edu](mailto:baltimo@caltech.edu)

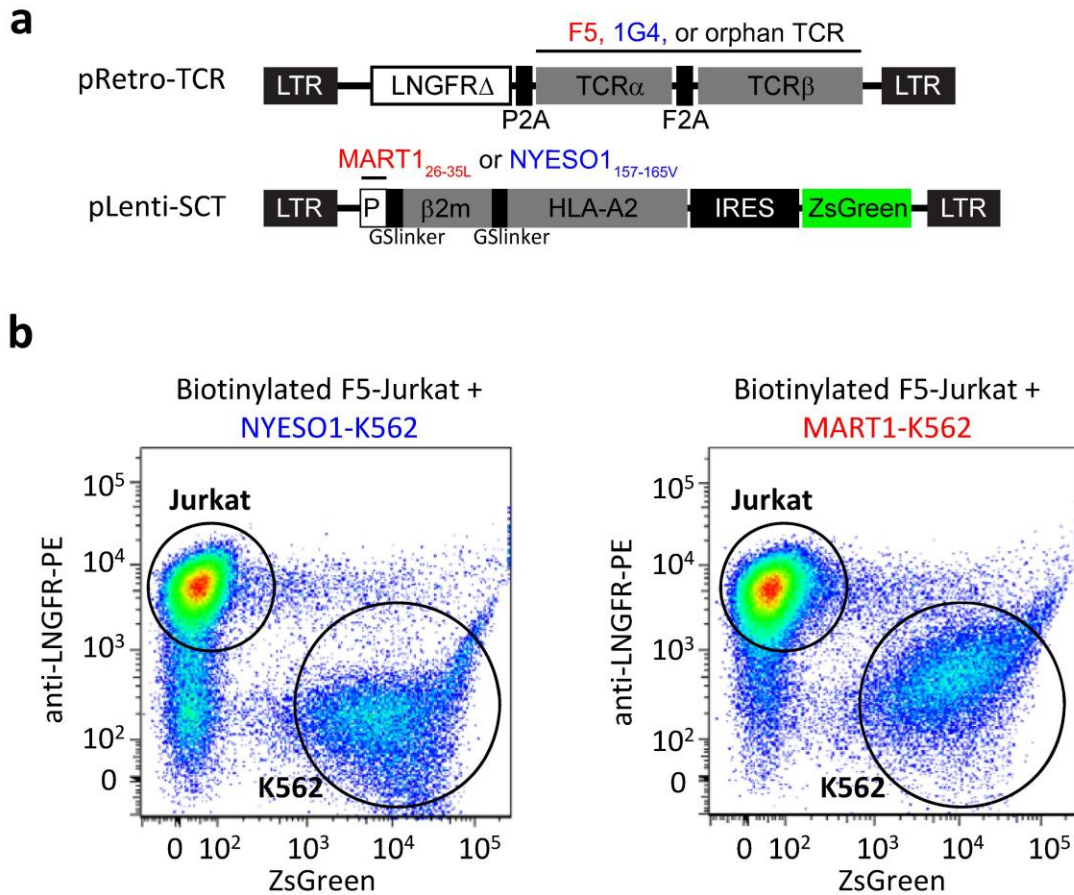

**Supplementary Figure 1**

**Establishment of Jurkat cells expressing F5 TCR or 1G4 TCR and K562 cells expressing single-chain trimer (SCT) of HLA-A2/MART1<sub>26-35(A27L)</sub> or HLA-A2/NYESO1<sub>157-165(C165V)</sub>.**

(a) A retroviral vector co-delivered F5 TCR or 1G4 TCR genes carrying either human or murine TCR constant regions together with LNGFR $\Delta$ , a transduction marker comprising low-affinity nerve growth factor receptor with the intracellular domain truncated, to Jurkat cells. A lentiviral vector co-delivered an SCT containing MART1 or NYESO1 peptide with ZsGreen as a transduction marker to K562 cells. SCTs are composed of a single polypeptide chain with a linear composition of antigenic peptide,  $\beta$ 2-microglobulin, and HLA-A2 domains via flexible GS linkers. (b) Resolution via flow cytometry of Jurkat and K562 cells. The Jurkat T cells and K562 cells were resolved by gating on the LNGFR<sup>+</sup> population and the ZsGreen<sup>+</sup> population, respectively.

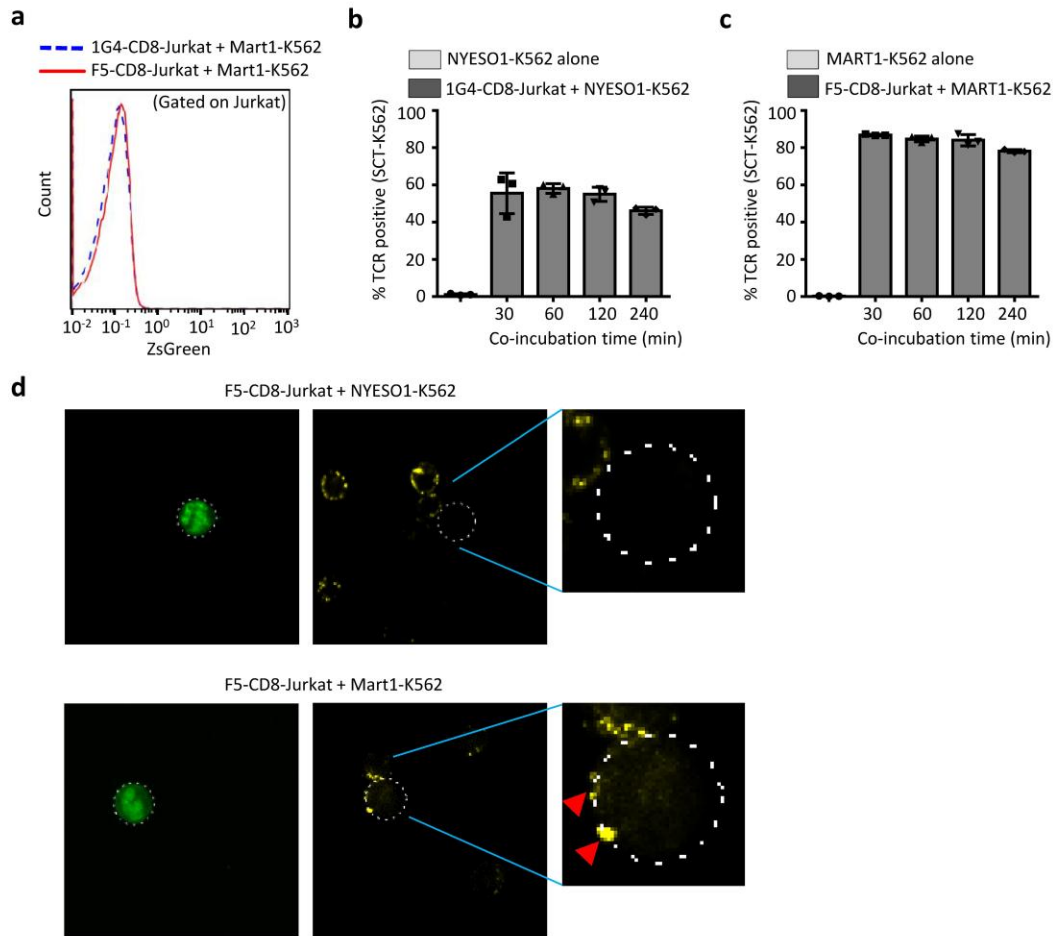

**Supplementary Figure 2**

**Target cell trogocytosis occurs in an antigen-specific manner.**

(a) ZsGreen cannot be transferred from K562 cells to Jurkat cells. Representative flow cytometry plot of ZsGreen level in F5-CD8-Jurkat or 1G4-CD8-Jurkat following co-incubation with MART1-K562. (b,c) The kinetics of trogocytosis for TCR-cognate pMHC interaction. Co-incubation of 1G4-CD8-Jurkat cells with NYESO1-K562 or F5-CD8-Jurkat cells with MART1-K562 for indicated time and trogocytosis was assessed using anti- $\mu$ TCR antibody ( $n = 3$ ). Data are presented as mean  $\pm$  s.e.m. (d) Immunofluorescence staining of co-incubated F5-CD8-Jurkat with NYESO-K562 (ZsGreen<sup>+</sup>) or MART1-K562 (ZsGreen<sup>+</sup>) by MART1 pMHC dextramer (yellow). Data in this figure are representative of at least two independent experiments.

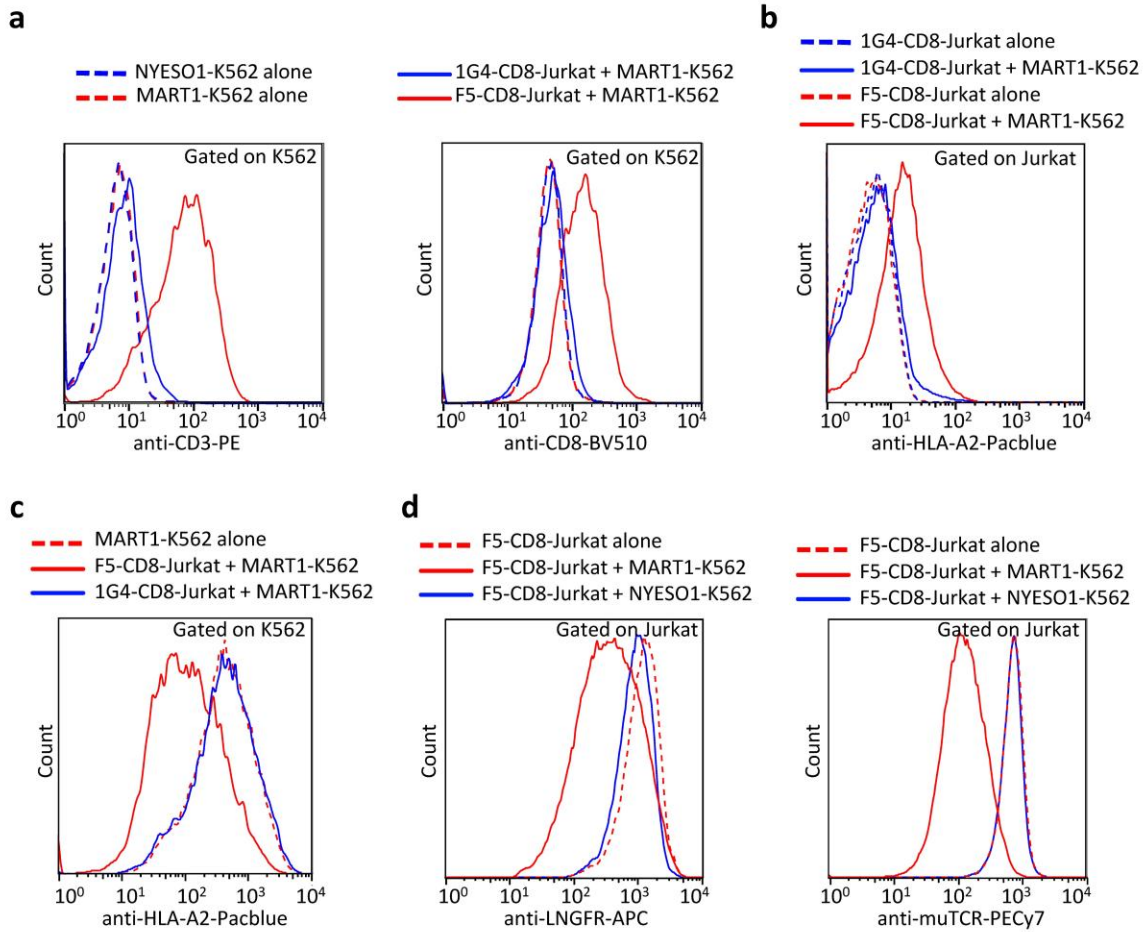

**Supplementary Figure 3**

**Trogocytosis can be tracked by multiple protein transfer.**

**(a)** Antigen-specific transfer of the T cell membrane proteins, CD3 and CD8, from CD8-expressing F5-Jurkat and 1G4-Jurkat cells to K562 cells (ZsGreen<sup>+</sup>), as assessed by anti-CD3 and anti-CD8 antibodies (5:1 J:K). **(b)** Antigen-specific transfer of the K562 cell membrane protein, HLA-A2, from K562 cells to Jurkat cells (ZsGreen<sup>-</sup>), as assessed by an anti-HLA-A2 antibody (5:1 J:K). **(c, d)** Concomitant reduction of membrane proteins from donor cells. Data are representative of three independent experiments.

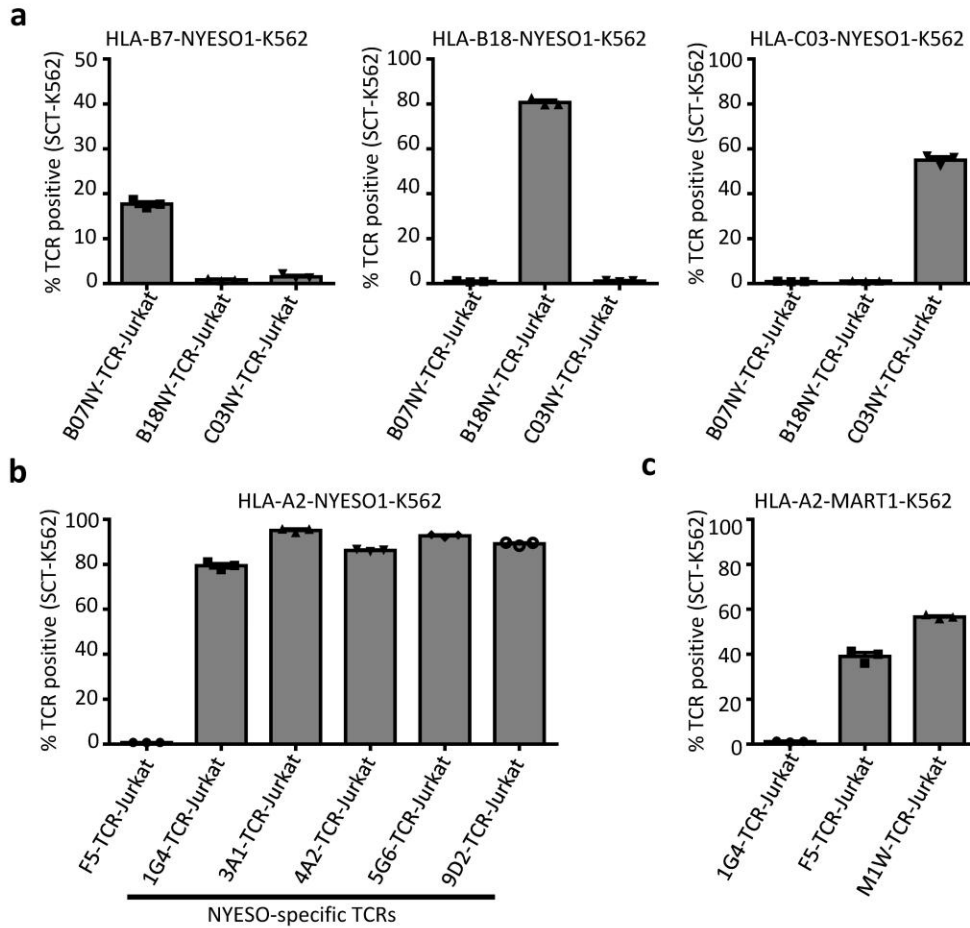

**Supplementary Figure 4**

**Trogocytosis occurs among various TCR and pMHC allele pairs.**

(a) Antigen-specific trogocytosis between Jurkat expressing B07-, B18- or C03-restricted NY-ESO-1-specific TCRs and K562 expressing their cognate antigens (10:1 J:K). (b) Comparison of trogocytosis capability 1G4-Jurkat cells or Jurkat cell expressing four other novel A2-restricted NYESO-specific TCRs with NYESO1-K562 cells (10:1 J:K). (c) Comparison of trogocytosis capability F5-Jurkat cells or Jurkat cell expressing low-affinity M1W-TCR with MART1-K562 cells (5:1 J:K). Data are presented as mean  $\pm$  s.e.m. and are representative of two independent experiments.

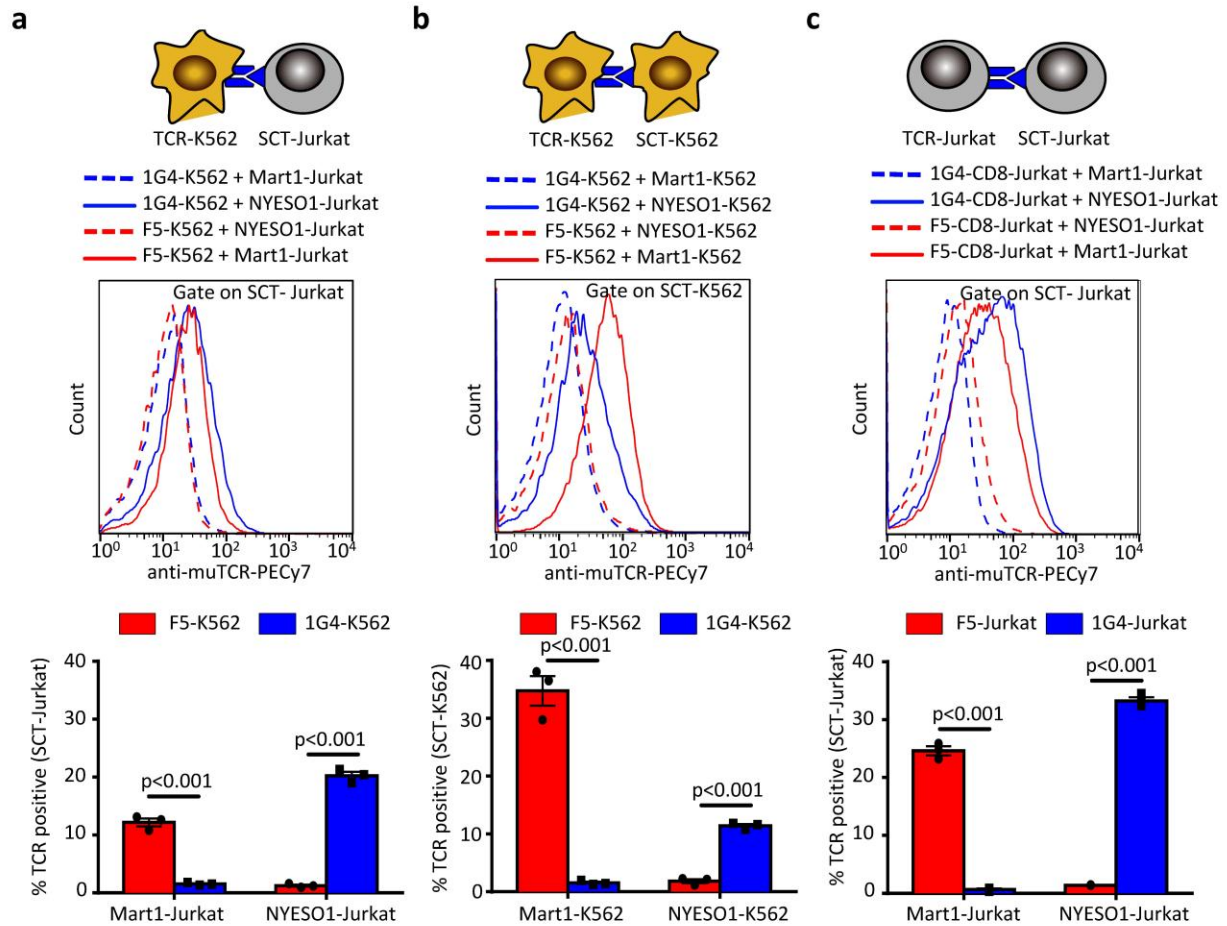

**Supplementary Figure 5**

**Antigen-specific TCR transfer occurs from donor cells to acceptor cells regardless of cell identity.**

(a) Antigen-specific transfer of TCR after co-incubation of a 5:1 ratio of F5 or 1G4 TCR-K562 cells and MART1 or NYESO1 SCT-Jurkat cells (ZsGreen<sup>+</sup>) as assessed by an anti-muTCR antibody. (b) Antigen-specific transfer of TCR after same-cell-type co-incubation of a 5:1 ratio of F5 or 1G4 TCR-K562 and MART1 or NYESO1 SCT-K562 (ZsGreen<sup>+</sup>) as assessed by an anti-muTCR antibody. (c) Antigen-specific transfer of TCR after co-incubation of a 1:1 ratio of F5 or 1G4 TCR-Jurkat and MART1 or NYESO1 SCT-Jurkat (ZsGreen<sup>+</sup>) as assessed by an anti-muTCR antibody. Mean and s.e.m. for each group is shown ( $n = 3$ ). Data are representative of two independent experiments.

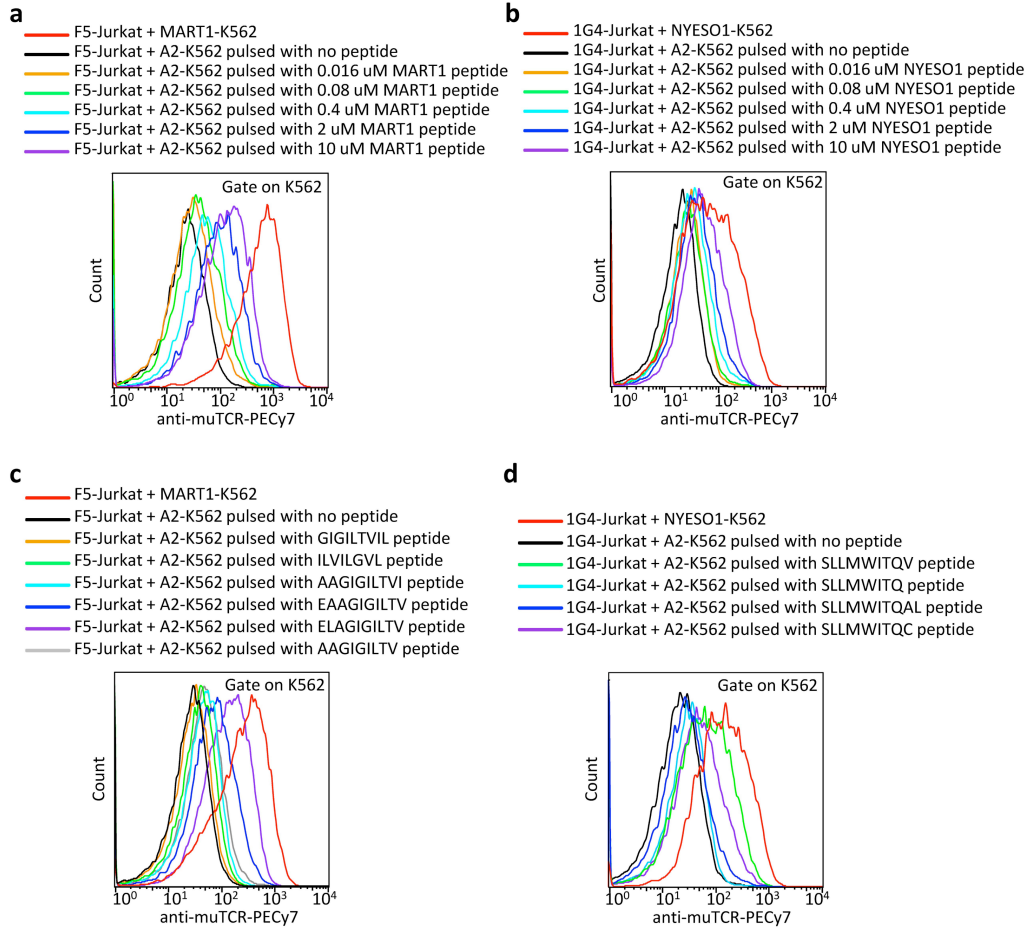

## Supplementary Figure 6

### Histographic visualization of trogocytosis capability based on peptide dosing and variants.

**(a)** Comparison of trogocytosis capability of murinized F5-Jurkat cells with A2-K562 cells loaded with different doses of cognate MART1 heteroclitic peptide (ELAGIGILTV). **(b)** Comparison of trogocytosis capability of murinized 1G4-Jurkat cells with A2-K562 cells loaded with different doses of cognate NYESO1 heteroclitic peptide (SLLMWITQV). **(c)** Comparison of trogocytosis capability of murinized F5-Jurkat cells with A2-K562 cells loaded with same dose of different MART1 peptide variants. **(d)** Comparison of trogocytosis capability of murinized 1G4-Jurkat cells with A2-K562 cells loaded with same dose of different NYESO1 peptide. Data are representative of two independent experiments.

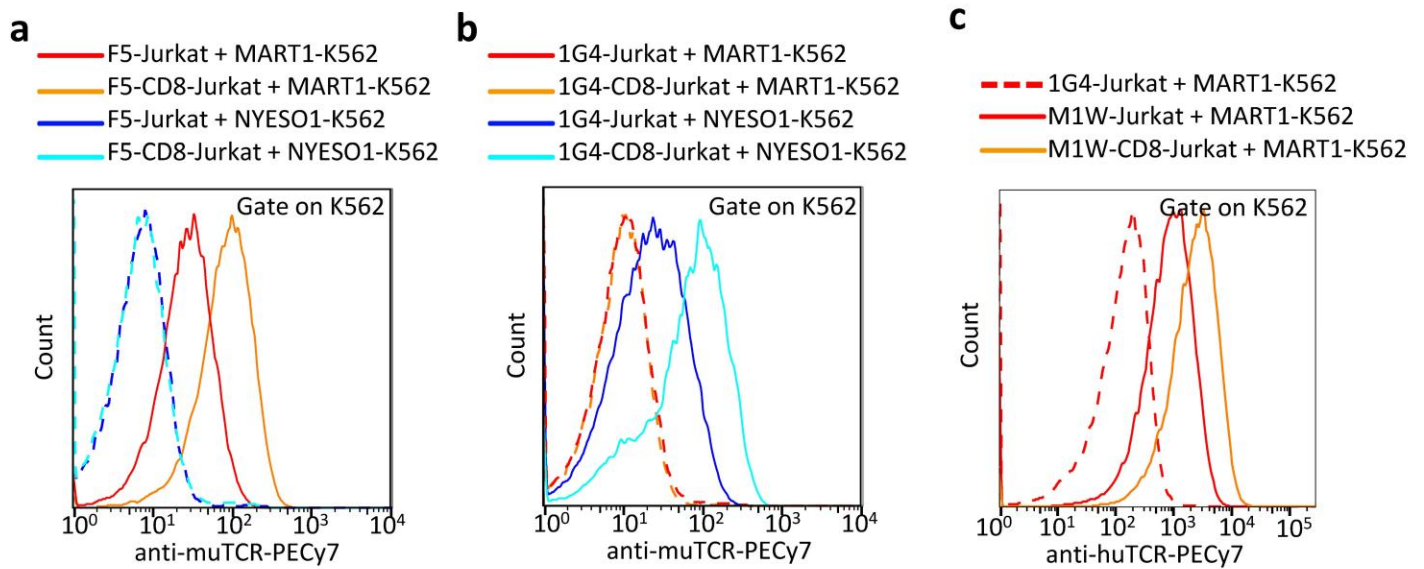

**Supplementary Figure 7**

**Target cell trogocytosis is enhanced by coexpression of CD8.**

**(a)** Comparison of trogocytosis capability of CD8<sup>+</sup> or CD8<sup>-</sup> murinized F5-Jurkat cells with MART1-K562 or NYESO1-K562 cells. **(b)** Comparison of trogocytosis capability of CD8<sup>+</sup> or CD8<sup>-</sup> murinized 1G4-Jurkat cells with MART1-K562 or NYESO1-K562 cells. **(c)** Comparison of trogocytosis capability of CD8<sup>+</sup> or CD8<sup>-</sup> M1W-Jurkat cells with MART1-K562 cells. Data are representative of two independent experiments.



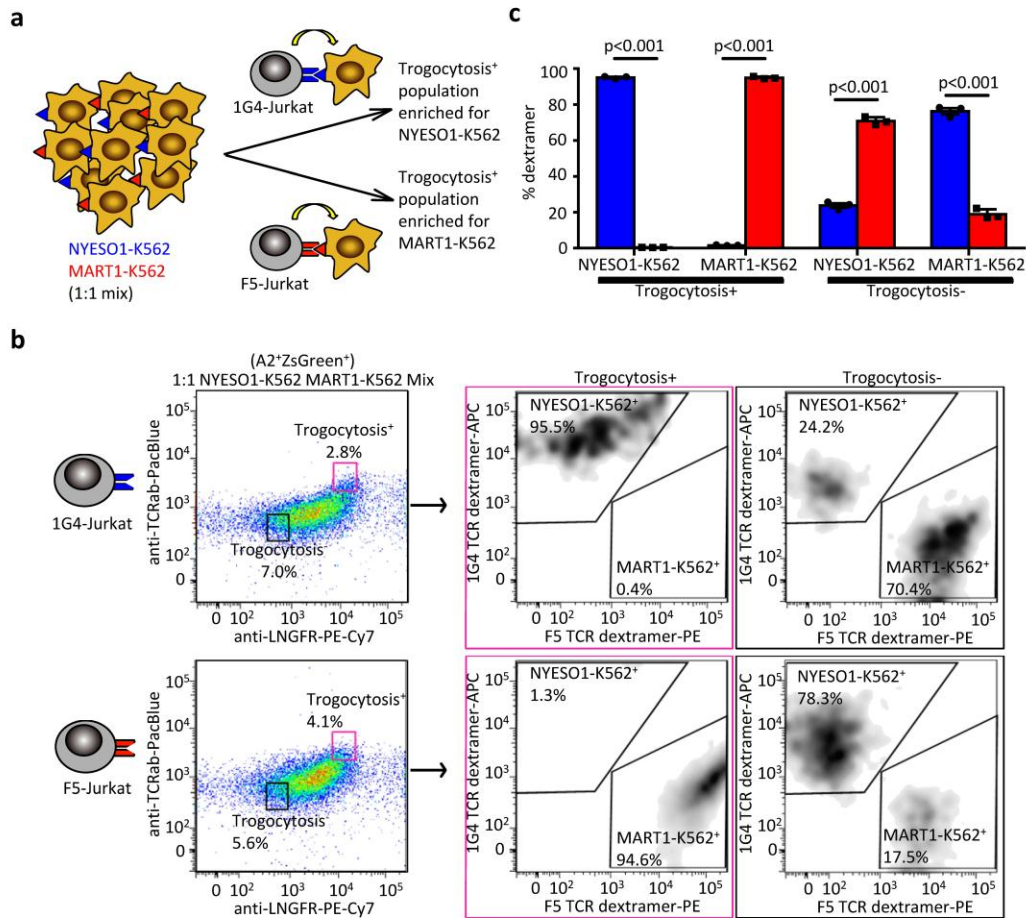

## Supplementary Figure 8

### Target cell trogocytosis resolves cognate antigen-expressing target cells from non-cognate antigen-expressing cells.

(a) Schematic of experiment. (b) Representative flow cytometry plots for a 1:1 mixture of NYESO1-K562 and MART1-K562 cells co-cultured with either 1G4-Jurkat (top) or F5-Jurkat (bottom) cells (10:1:1 Jurkat: NYESO1-K562:MART1-K562). The trogocytosis<sup>+</sup> and trogocytosis<sup>-</sup> populations were verified for antigen specificity by use of either F5 TCR or 1G4 TCR dextramer staining. Data are representative of two independent experiments. (c) Quantification of antigen-specific target cell in trogocytosis<sup>+</sup> and trogocytosis<sup>-</sup> populations via F5 TCR or 1G4 TCR dextramer staining ( $n = 3$ ). Statistical analysis of quantification was performed using unpaired two-tailed Student's *t*-test. Data in b, c are presented as mean  $\pm$  s.e.m. and are representative of two independent experiments.

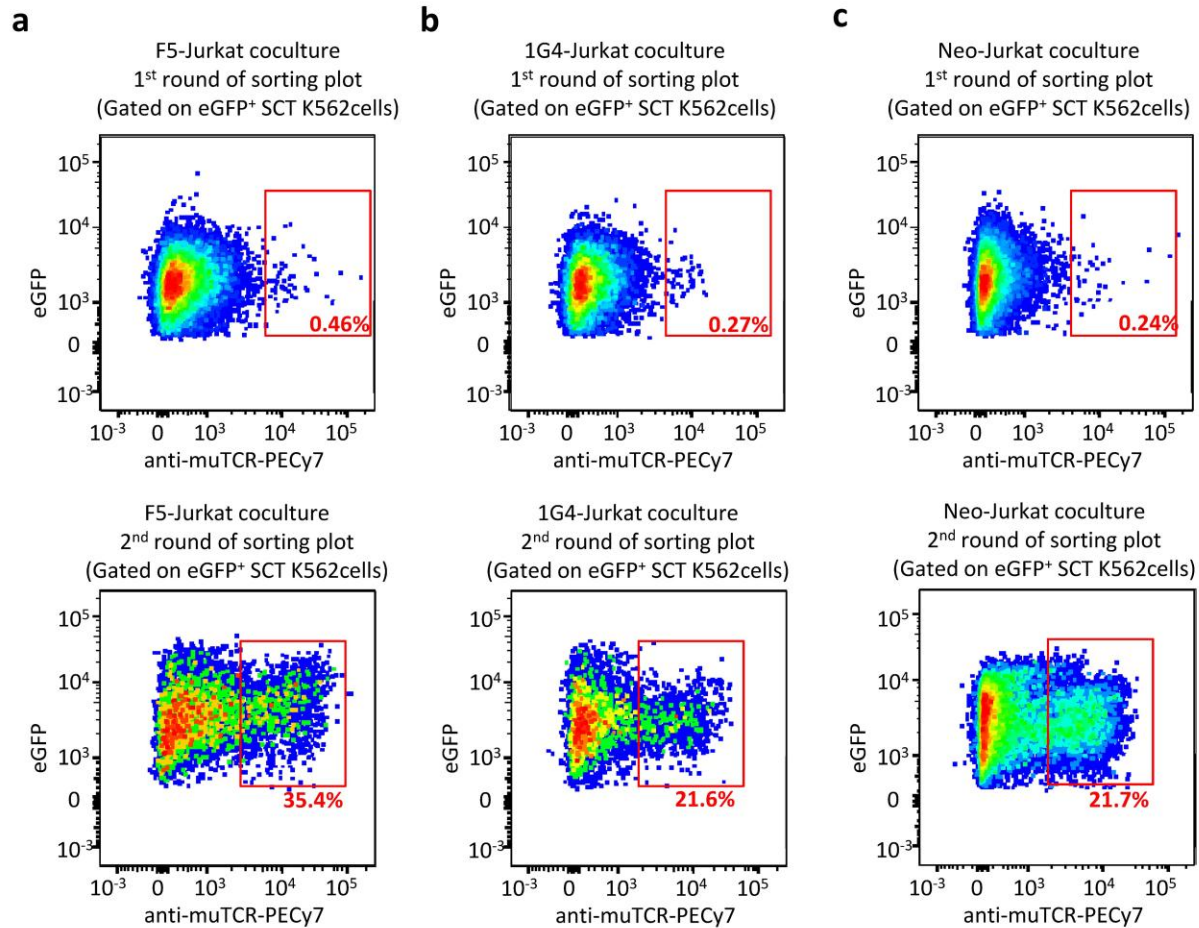

**Supplementary Figure 9**

**Flow cytometry plot for the first- and second-round sortings from co-incubation.**

(a,b,c) F5-Jurkat, 1G4-Jurkat or neoTCR-Jurkat cells (E2-Crimson<sup>+</sup>CD8<sup>+</sup>) were co-incubated with K562 library cells and trogocytosis<sup>+</sup> A2-SCT-K562 cells (E2-Crimson<sup>-</sup>eGFP<sup>+</sup>TCR<sup>+</sup>) in red box were gated for sorting using FACS. Data are representative of two or three independent experiments.

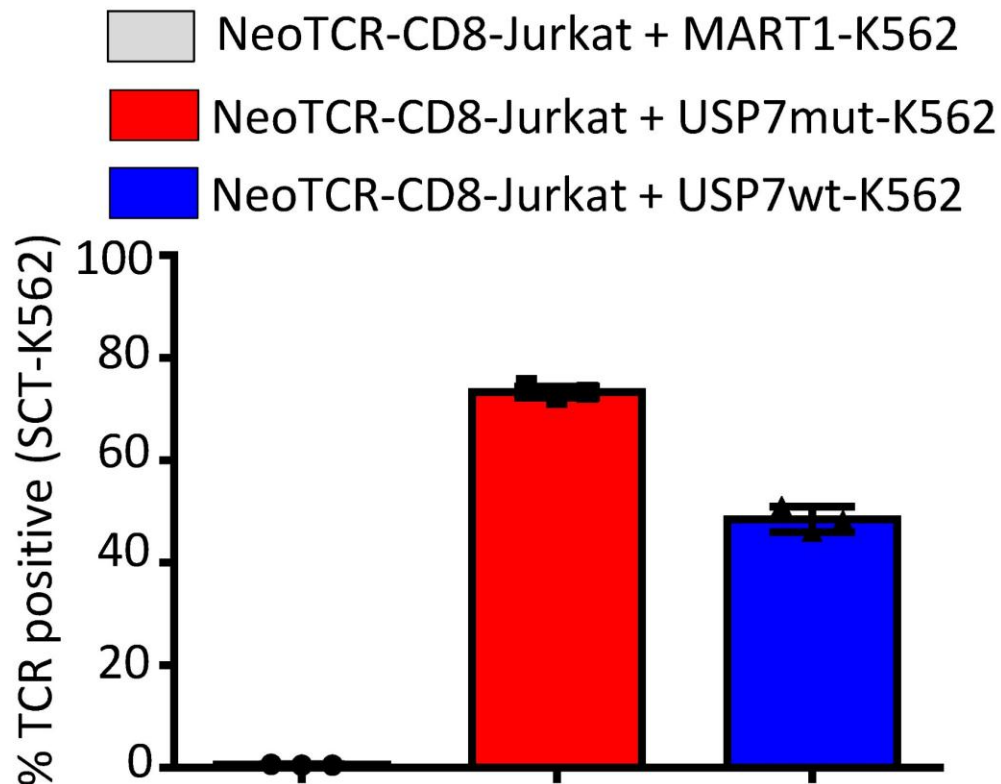

**Supplementary Figure 10**

**Comparison of trogocytosis capacity of NeoTCR-CD8-Jurkat cells with MART1-K562, USP7mut-K562 or USP7wt-K562 cells.**

The predicted affinity of mutUSP7 and wtUSP7 for the HLA-A2 binding groove by NetMHC are 33 nM and 7  $\mu$ M, respectively. Data are presented as mean  $\pm$  s.e.m. ( $n = 3$ ) and are representative of two independent experiments.

## SUPPLEMENTARY INFORMATION

## Flow cytometry gating strategies.

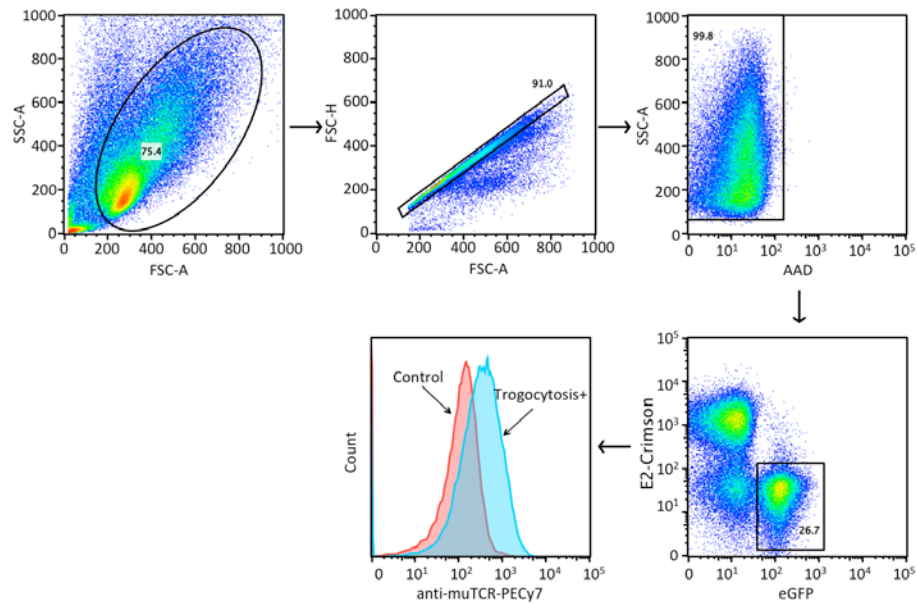

Flow cytometric analysis of sorted trogocytosis<sup>+</sup> SCT-K562 cells following a validating co-incubation with F5-Jurkat or 1G4-Jurkat (2:1 J:K). The cells were first gated on FSC/SSC, followed by the exclusion of doublet events and dead cells (AAD<sup>+</sup>). eGFP<sup>+</sup> K562 cells were then further gated for analysis of the transferred TCR level on the surface. These gating strategies were used for all library screening (n=3).
